# Supplementary material for: Two bismuth iodate sulfates with enhanced optical anisotropy
Source: Royal Society of Chemistry journal article supplement (doi:10.1039/d1dt02514g), 2021-01-01
Supplement: d1dt02514g1.pdf [file d1dt02514g1.pdf]

**Supporting Information for**

**Two Bismuth Iodate Sulfates with Enhanced Optical Anisotropy**

Yilin Li<sup>a, b, c, d</sup>, Chunli Hu<sup>a</sup>, Jin Chen<sup>a, d</sup> and Jianggao Mao<sup>\*a</sup>

<sup>a</sup>State Key Laboratory of Structural Chemistry, Fujian Institute of Research on the Structure of Matter, Chinese Academy of Sciences, Fuzhou 350002, China

<sup>b</sup>School of Physical Science and Technology, ShanghaiTech University, Shanghai 201210, China

<sup>c</sup>Shanghai Advanced Research Institute, Chinese Academy of Sciences, Shanghai 201210, China

<sup>d</sup>University of Chinese Academy of Sciences, Beijing 100049, China

Email: mjpg@fjirsm.ac.cn

## Table of Contents

Table S1. Crystallographic data of  $\text{Bi}(\text{IO}_3)(\text{SO}_4)$  and  $\text{CdBi}(\text{IO}_3)(\text{SO}_4)_2$

Table S2. Selected bond distances and the calculated bond orders of  $\text{Bi}(\text{IO}_3)(\text{SO}_4)$  and  $\text{CdBi}(\text{IO}_3)(\text{SO}_4)_2$

Figure S1. The photographs of  $\text{Bi}(\text{IO}_3)(\text{SO}_4)$  (a) and  $\text{CdBi}(\text{IO}_3)(\text{SO}_4)_2$  (b)

Figure S2. Experimental and simulated powder X-ray diffraction (PXRD) patterns of  $\text{Bi}(\text{IO}_3)(\text{SO}_4)$  (a) and  $\text{CdBi}(\text{IO}_3)(\text{SO}_4)_2$  (b)

Figure S3. View of the coordination geometry around  $\text{Bi}^{3+}$  (a) in  $\text{Bi}(\text{IO}_3)(\text{SO}_4)$  and the coordination geometries around  $\text{Cd}^{2+}$  (b) and  $\text{Bi}^{3+}$  (c) in  $\text{CdBi}(\text{IO}_3)(\text{SO}_4)_2$

Figure S4. Thermogravimetry (TG) and differential scanning calorimetry (DSC) curves of  $\text{Bi}(\text{IO}_3)(\text{SO}_4)$  (a) and  $\text{CdBi}(\text{IO}_3)(\text{SO}_4)_2$  (b)

Figure S5. The infrared spectra of  $\text{Bi}(\text{IO}_3)(\text{SO}_4)$  (a) and  $\text{CdBi}(\text{IO}_3)(\text{SO}_4)_2$  (b)

Figure S6. Calculated band structures of  $\text{Bi}(\text{IO}_3)(\text{SO}_4)$  (a) and  $\text{CdBi}(\text{IO}_3)(\text{SO}_4)_2$  (b)

Figure S7. Partial density of states of  $\text{Bi}(\text{IO}_3)(\text{SO}_4)$  (a) and  $\text{CdBi}(\text{IO}_3)(\text{SO}_4)_2$  (b)

Table S1. Crystallographic data of Bi(IO<sub>3</sub>)(SO<sub>4</sub>) and CdBi(IO<sub>3</sub>)(SO<sub>4</sub>)<sub>2</sub>.

| formula                                                                                  | Bi(IO <sub>3</sub> )(SO <sub>4</sub> ) | CdBi(IO <sub>3</sub> )(SO <sub>4</sub> ) <sub>2</sub> |
|------------------------------------------------------------------------------------------|----------------------------------------|-------------------------------------------------------|
| formula weight                                                                           | 479.94                                 | 688.40                                                |
| crystal system                                                                           | monoclinic                             | monoclinic                                            |
| space group                                                                              | <i>P</i> 2 <sub>1</sub> / <i>c</i>     | <i>P</i> 2 <sub>1</sub> / <i>c</i>                    |
| <i>T</i> (K)                                                                             | 293(2)                                 | 293(2)                                                |
| <i>a</i> (Å)                                                                             | 9.4355(2)                              | 12.777(2)                                             |
| <i>b</i> (Å)                                                                             | 6.9168(2)                              | 6.8491(9)                                             |
| <i>c</i> (Å)                                                                             | 8.3374(2)                              | 9.9835(14)                                            |
| <i>β</i> (deg)                                                                           | 105.168(2)                             | 103.226(15)                                           |
| <i>V</i> (Å <sup>3</sup> )                                                               | 525.17(2)                              | 850.5(2)                                              |
| <i>Z</i>                                                                                 | 4                                      | 4                                                     |
| <i>D<sub>c</sub></i> (g/cm <sup>-3</sup> )                                               | 6.070                                  | 5.376                                                 |
| <i>μ</i> (mm <sup>-1</sup> )                                                             | 39.827                                 | 27.341                                                |
| <i>θ</i> <sub>max</sub> /deg                                                             | 27.101                                 | 26.361                                                |
| completeness/%                                                                           | 99.8                                   | 99.7                                                  |
| goodness of fit on <i>F</i> <sup>2</sup>                                                 | 1.115                                  | 1.018                                                 |
| <i>R</i> <sub>1</sub> , <i>wR</i> <sub>2</sub> [ <i>I</i> > 2σ( <i>I</i> )] <sup>a</sup> | 0.0215, 0.0490                         | 0.0299, 0.0500                                        |
| <i>R</i> <sub>1</sub> , <i>wR</i> <sub>2</sub> (all data) <sup>a</sup>                   | 0.0223, 0.0493                         | 0.0380, 0.0534                                        |
| extinction coefficient                                                                   | none                                   | none                                                  |

$$^a R_1 = \sum ||F_o| - |F_c|| / \sum |F_o|, \text{ and } wR_2 = \{ \sum w[(F_o)^2 - (F_c)^2]^2 / \sum w[(F_o)^2]^2 \}^{1/2}.$$

Table S2. Selected bond distances (Å) and the calculated bond orders of Bi(IO<sub>3</sub>)(SO<sub>4</sub>) and CdBi(IO<sub>3</sub>)(SO<sub>4</sub>)<sub>2</sub>.

| Bi(IO <sub>3</sub> )(SO <sub>4</sub> )                                         |             |            |              |             |            |
|--------------------------------------------------------------------------------|-------------|------------|--------------|-------------|------------|
| Bond                                                                           | Bond length | Bond order | Bond         | Bond length | Bond order |
| Bi(1)-O(2)#1                                                                   | 2.291(4)    | 0.59       | Bi(1)-O(7)#6 | 2.727(5)    | 0.18       |
| Bi(1)-O(6)#2                                                                   | 2.340(5)    | 0.51       | I(1)-O(3)    | 1.808(5)    | 1.69       |
| Bi(1)-O(1)#3                                                                   | 2.426(5)    | 0.41       | I(1)-O(2)    | 1.816(4)    | 1.66       |
| Bi(1)-O(4)#4                                                                   | 2.495(5)    | 0.34       | I(1)-O(1)    | 1.839(4)    | 1.56       |
| Bi(1)-O(5)                                                                     | 2.563(5)    | 0.28       | S(1)-O(7)    | 1.467(5)    | 1.53       |
| Bi(1)-O(4)                                                                     | 2.657(5)    | 0.22       | S(1)-O(5)    | 1.477(5)    | 1.49       |
| Bi(1)-O(1)                                                                     | 2.686(5)    | 0.20       | S(1)-O(6)    | 1.477(5)    | 1.49       |
| Bi(1)-O(5)#5                                                                   | 2.713(5)    | 0.19       | S(1)-O(4)    | 1.495(5)    | 1.42       |
| Symmetry transformations used to generate equivalent atoms:                    |             |            |              |             |            |
| #1 -x+2, y-1/2, -z+5/2;      #2 -x+1, y-1/2, -z+3/2;      #3 x, -y+1/2, z-1/2; |             |            |              |             |            |
| #4 -x+1, -y, -z+2;      #5 x, -y+1/2, z+1/2;      #6 -x+1, y+1/2, -z+3/2.      |             |            |              |             |            |
| CdBi(IO <sub>3</sub> )(SO <sub>4</sub> ) <sub>2</sub>                          |             |            |              |             |            |
| Bond                                                                           | Bond length | Bond order | Bond         | Bond length | Bond order |
| Cd(1)-O(8)                                                                     | 2.217(6)    | 0.43       | I(1)-O(2)    | 1.771(6)    | 1.87       |
| Cd(1)-O(7)                                                                     | 2.232(5)    | 0.41       | I(1)-O(1)    | 1.856(5)    | 1.49       |
| Cd(1)-O(9)#1                                                                   | 2.247(6)    | 0.40       | I(1)-O(3)    | 1.976(5)    | 1.07       |
| Cd(1)-O(6)#2                                                                   | 2.275(6)    | 0.37       | I(1)-O(3)#6  | 2.085(5)    | 0.80       |
| Cd(1)-O(4)#3                                                                   | 2.313(5)    | 0.33       | S(1)-O(7)    | 1.454(6)    | 1.58       |
| Cd(1)-O(4)#4                                                                   | 2.358(5)    | 0.29       | S(1)-O(6)    | 1.472(6)    | 1.51       |
| Bi(1)-O(1)                                                                     | 2.236(5)    | 0.68       | S(1)-O(5)    | 1.478(7)    | 1.48       |
| Bi(1)-O(2)#5                                                                   | 2.255(6)    | 0.65       | S(1)-O(4)    | 1.486(5)    | 1.45       |

|                                                             |          |                           |            |                           |      |
|-------------------------------------------------------------|----------|---------------------------|------------|---------------------------|------|
| Bi(1)-O(3)#6                                                | 2.314(5) | 0.55                      | S(2)-O(8)  | 1.458(6)                  | 1.57 |
| Bi(1)-O(5)                                                  | 2.460(6) | 0.37                      | S(2)-O(9)  | 1.470(6)                  | 1.52 |
| Bi(1)-O(11)#1                                               | 2.554(5) | 0.29                      | S(2)-O(11) | 1.471(6)                  | 1.51 |
| Bi(1)-O(10)#5                                               | 2.603(6) | 0.25                      | S(2)-O(10) | 1.477(6)                  | 1.49 |
| Symmetry transformations used to generate equivalent atoms: |          |                           |            |                           |      |
| #1 $x, -y+3/2, z+1/2;$                                      |          | #2 $-x+2, y+1/2, -z+1/2;$ |            | #3 $-x+2, -y+1, -z+1;$    |      |
| #4 $x, y+1, z;$                                             |          | #5 $x, -y+1/2, z+1/2;$    |            | #6 $-x+1, y+1/2, -z+1/2.$ |      |

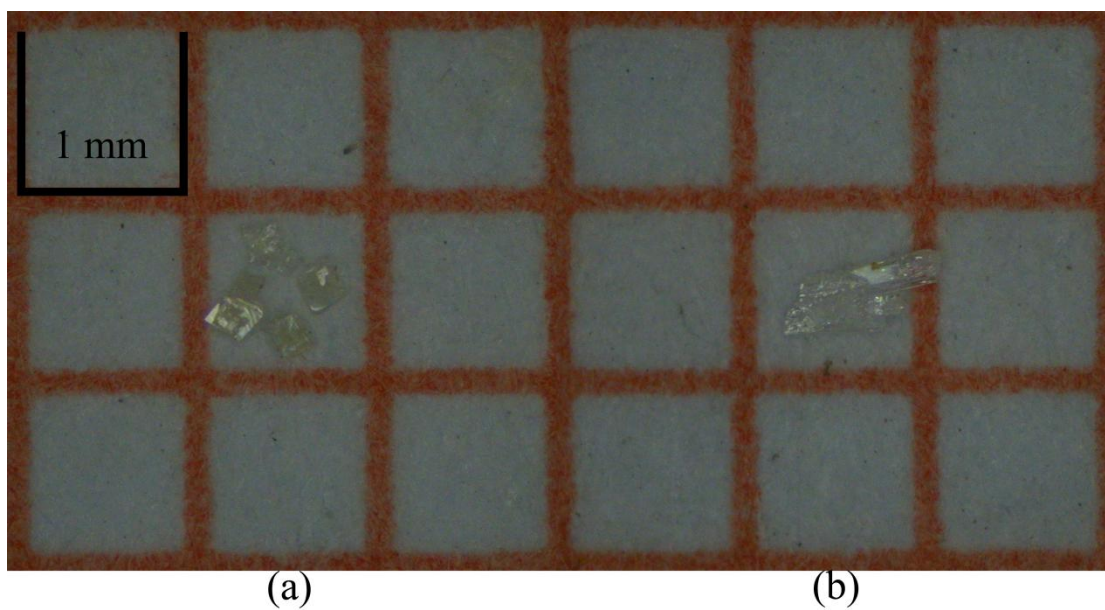

Figure S1. The photographs of  $\text{Bi}(\text{IO}_3)(\text{SO}_4)$  (a) and  $\text{CdBi}(\text{IO}_3)(\text{SO}_4)_2$  (b)

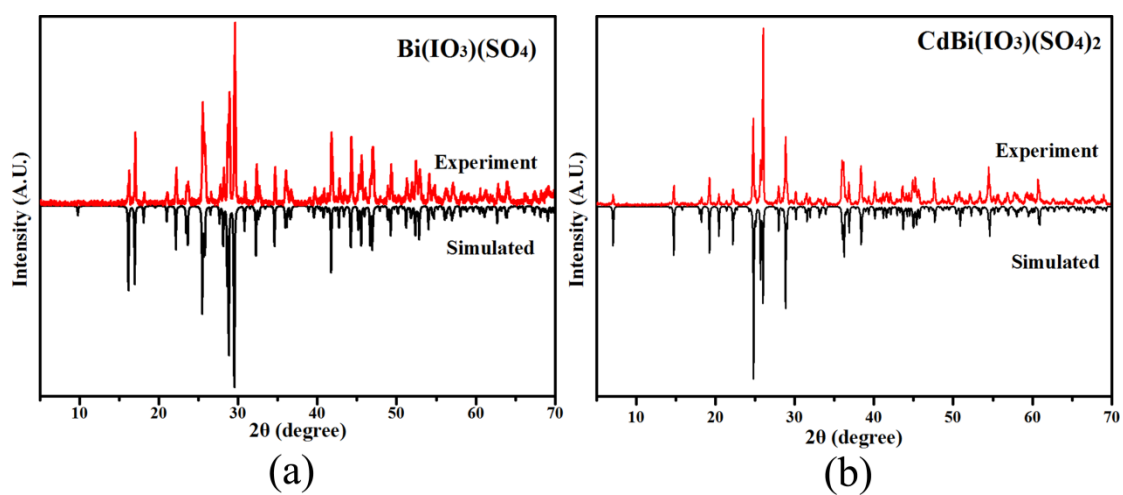

Figure S2. Experimental and simulated powder X-ray diffraction (PXRD) patterns of  $\text{Bi}(\text{IO}_3)(\text{SO}_4)$  (a) and  $\text{CdBi}(\text{IO}_3)(\text{SO}_4)_2$  (b).

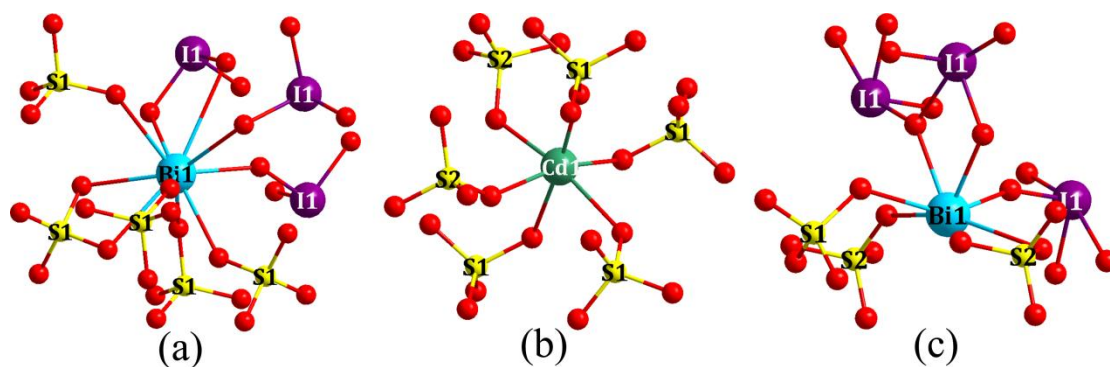

Figure S3. View of the coordination geometry around Bi<sup>3+</sup> (a) in Bi(IO<sub>3</sub>)(SO<sub>4</sub>) and the coordination geometries around Cd<sup>2+</sup> (b) and Bi<sup>3+</sup> (c) in CdBi(IO<sub>3</sub>)(SO<sub>4</sub>)<sub>2</sub>.

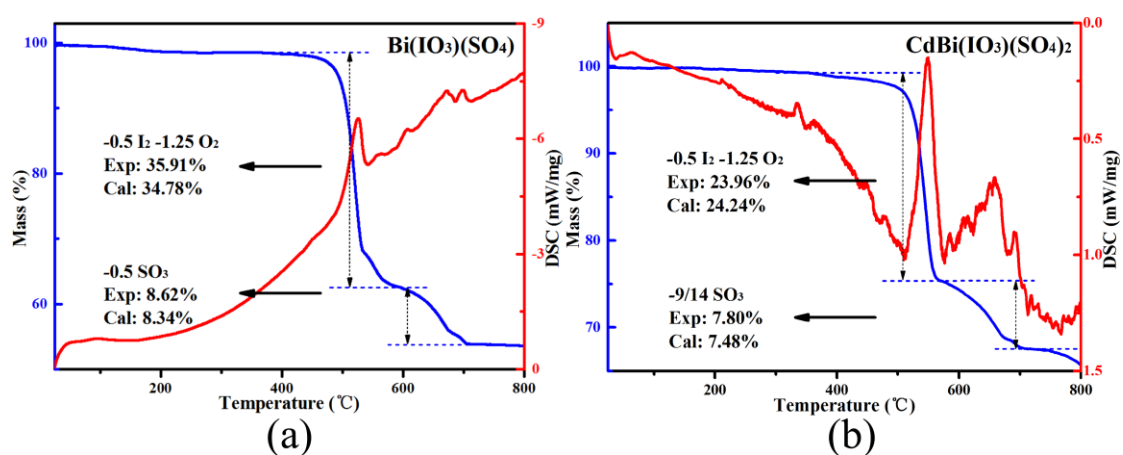

Figure S4. Thermogravimetry (TG) and differential scanning calorimetry (DSC) curves of Bi(IO<sub>3</sub>)(SO<sub>4</sub>) (a) and CdBi(IO<sub>3</sub>)(SO<sub>4</sub>)<sub>2</sub> (b).

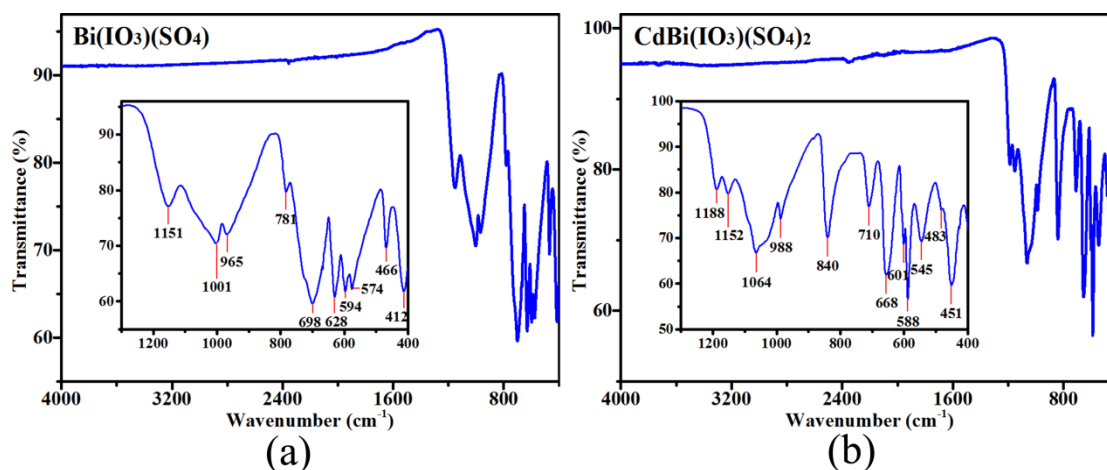

Figure S5. Infrared spectra of Bi(IO<sub>3</sub>)(SO<sub>4</sub>) (a) and CdBi(IO<sub>3</sub>)(SO<sub>4</sub>)<sub>2</sub> (b).

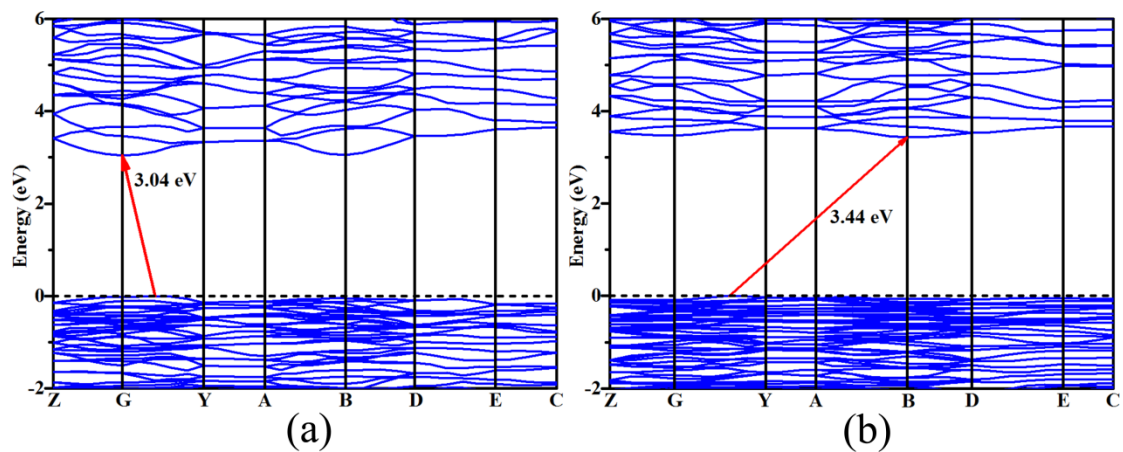

Figure S6. Calculated band structures of  $\text{Bi}(\text{IO}_3)(\text{SO}_4)$  (a) and  $\text{CdBi}(\text{IO}_3)(\text{SO}_4)_2$  (b).

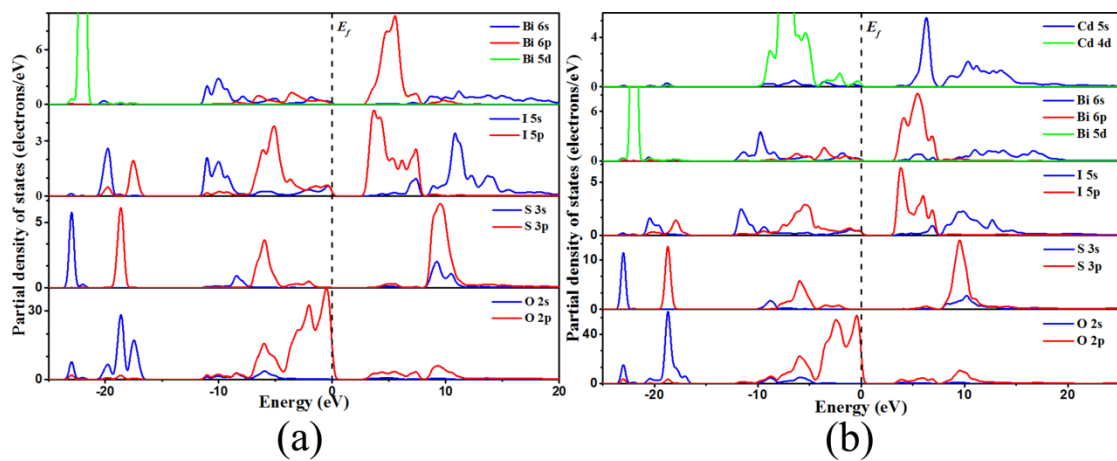

Figure S7. Partial density of states of  $\text{Bi}(\text{IO}_3)(\text{SO}_4)$  (a) and  $\text{CdBi}(\text{IO}_3)(\text{SO}_4)_2$  (b).
